# Supplementary material for: Transcriptome Analysis of Wnt3a-Treated Triple-Negative Breast Cancer Cells
Source: PubMed Central journal article supplement (PMC4388387; doi:10.1371/journal.pone.0122333), 2015-04-07
Supplement: pone.0122333.s013.pdf [file pone.0122333.s013.pdf]

up-6h

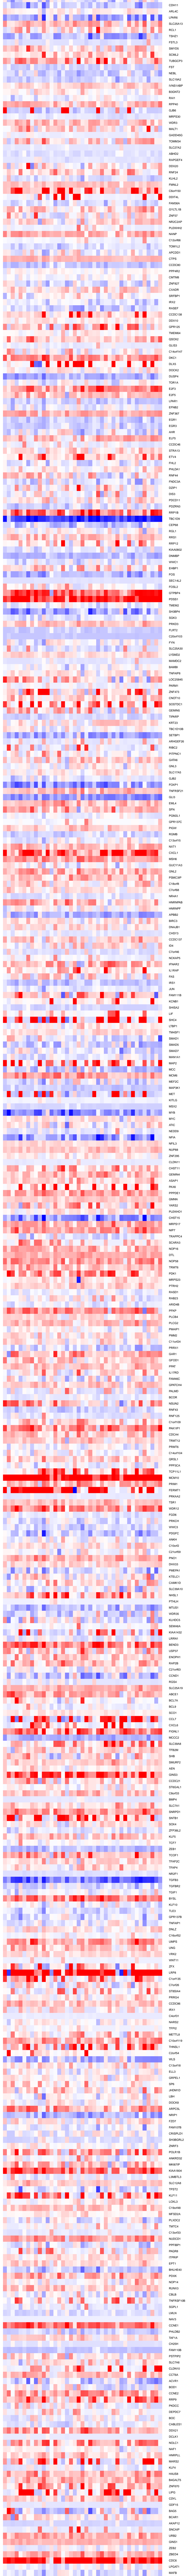

C17orf96  
ATPA  
CDH11  
ARL4C  
LPAR6  
SLC25A13  
RCL1  
TSHZ1  
FSTL3  
SMYD5  
SCML2  
TUBGCP3  
FST  
NEBL  
SLC19A2  
IVNS1ABP  
B3GNT2  
RAI1  
RPP40  
GJB6  
MRPS30  
WDR3  
MALT1  
GADD45G  
TOMM34  
SLC27A2  
ABHD2  
RAPGEF4  
DDX20  
RNF24  
KLHL2  
FMNL2  
C6orf150  
DDIT4L  
FAM36A  
GYLTL1B  
ZNF57  
NR2C2AP  
PLEKH2  
NANP  
C12orf66  
TOM1L2  
APCDD1  
CTPS  
CCDC80  
PPP4R2  
CMTM8  
ZNF827  
CXADR  
SRFBP1  
IRX2  
RASEF  
CCDC138  
DDX10  
GPR125  
TMEM64  
OSOX2  
GLIS3  
C14orf147  
DKC1  
DLX5  
DOCK2  
DUSP4  
TOR1A  
E2F3  
E2F5  
LPAR1  
EFNB2  
ZNF367  
EGR1  
EGR3  
AHR  
ELF5  
CCDC46  
STRA13  
ETV4  
FHL2  
PHLDA1  
RNF44  
FNDC3A  
DZIP1  
DIS3  
PDCD11  
PDZRN3  
RRP18  
TBC1D9  
CEP88  
RGL1  
RRS1  
RRP12  
KIAA0802  
DNMBP  
WVC1  
EHP1  
FOS  
SEC14L2  
FOSL2  
GTPBP4  
PDSS1  
TMEM2  
SH3BP4  
SGK3  
PRKD3  
FLRT2  
C20orf103  
FYN  
SLC25A30  
LYSMD2  
MAMDC2  
BAMBI  
TNFAIP8  
LOC25845  
PARM1  
ZNF473  
CNTO10  
SOSTDC1  
GEMIN5  
TIPARP  
KRT23  
TBC1D10B  
SETBP1  
ARHGEF26  
RIBC2  
PITPNC1  
GATA6  
GNL3  
SLC17A5  
GJB2  
FOXP1  
TNFRSF21  
GLI3  
EML4  
SFN  
PGM2L1  
GPR137C  
PIGW  
RGM8  
C13orf15  
NXT1  
CXCL1  
MSH6  
GUCY1A3  
GNL2  
PSMC3IP  
C18orf8  
C7orf88  
NR4A1  
HNRNPAB  
HNRNPF  
APBB2  
BIRC3  
DNAJB1  
CHSY3  
CCDC137  
IDA  
C7orf46  
NCKAP5  
IFNAR2  
IL1RAP  
FAS  
IRS1  
JUN  
FAM111B  
KCNB1  
SHISA2  
LIF  
SHC4  
LTBP1  
TM4SF1  
SMAD1  
SMAD5  
SMAD7  
MAN1A1  
MAP2  
MCC  
MCM6  
MEF2C  
MAP3K1  
MET  
KITLG  
MSX2  
MYB  
MYC  
ATIC  
NEDD9  
NFIA  
NFIL3  
NUP88  
ZNF295  
CLDN11  
CHST11  
GEMIN4  
ASAP1  
PAX6  
PPPDE1  
GMNN  
YARS2  
PLEKH01  
CHST17  
MRPS17  
NIP7  
TRAPPC4  
SCARA3  
NOP16  
DTL  
NOP58  
TRMT6  
PDK1  
MRPS23  
PTRH2  
RASD1  
RAB23  
ARID4B  
PFKP  
PLCB4  
PLCG2  
PMAIP1  
PMM2  
C11orf24  
PRRX1  
GAR1  
GFOD1  
PPAT  
IL17RD  
FAM46C  
GPATCH4  
PALMD  
BCOR  
NSUN2  
RNF43  
RNF125  
C10orf109  
PAK1IP1  
CDCA4  
TRMT12  
PRMT6  
C14orf104  
QRSL1  
PPP3CA  
TCP11L1  
MCM10  
PRIM1  
FERMT1  
PRKAA2  
TSR1  
WDR12  
FGD6  
PRKCH  
WWC3  
PDGFC  
ANKH  
C10orf2  
C21orf59  
PNO1  
DHX33  
PMEPA1  
KTELC1  
CAMK1D  
SLC39A10  
NHSL1  
PTHLH  
MTUS1  
WDR35  
KLHDC5  
SEMA6A  
KIAA1432  
LRRN1  
BEND3  
USP37  
ENOPH1  
RAP2B  
C21orf63  
CCND1  
RGS4  
SLC25A19  
ABCE1  
BCL7A  
BCL9  
SCO1  
CC7  
CXCL6  
FIGNL1  
MCCC2  
SLC39A8  
TFB2M  
SHB  
SMURF2  
AEN  
GINS3  
CCDC21  
ST6GAL1  
C8orf33  
BMP4  
SLC7A1  
SNRPD1  
SNTB1  
SOX4  
ZFP36L2  
KLF5  
TCF7  
ZEB1  
TCOF1  
TFAP2C  
TFAP4  
NR2F1  
TGFB3  
TGFB2  
TGIF1  
BYSL  
KLF10  
TLE3  
GPR137B  
TNFAIP1  
DNLZ  
C16orf52  
UMPS  
UNG  
VRK2  
WNT11  
ZFX  
LRP8  
C10orf135  
C7orf26  
ST8SIA4  
PRRG4  
CCDC86  
IRX1  
C4orf31  
NARS2  
TFPI2  
METTL8  
C10orf119  
THNSL1  
C2orf54  
WLS  
C13orf18  
ELL3  
GRPEL1  
SP6  
JHDM1D  
LBH  
DOCK8  
ARPC5L  
NRIP1  
FZD7  
FAM107B  
CRISPLD1  
SH3BGR2  
ZNRF3  
POLR1B  
ANKRD32  
MKI67P  
KIAA1804  
L3MBTL3  
SLC12A8  
TPST2  
KLF11  
LOXL3  
C19orf48  
PLXD2  
TMTCA  
C13orf33  
NUDCD1  
PPFBP1  
PAQR8  
ITPRIP  
EPT1  
BHLHE40  
PDXK  
NOP14  
RUNX3  
CBLB  
TNFRSF10B  
SGPL1  
LMLN  
NAV3  
CCNE1  
PHLDB2  
TAF1A  
CH25H  
FAM110B  
PSTPIP2  
SLC7A6  
CLDN10  
CC76A  
ACVR1  
BOD1  
CCNE2  
RRP9  
PKDCC  
DEPDC7  
BOC  
CABLES1  
DDX21  
DCLK1  
NOLC1  
NAF1  
HNRPLL  
MARS2  
KLF4  
HAUS8  
B4GALT5  
ZNF670  
LIPG  
CDYL  
GDF15  
BAG5  
BCAR1  
AKAP12  
SNCAIP  
URB2  
GINS1  
ZEB2  
ZBED4  
CDC6  
LPGAT1  
MAFB  
CDC25A

up-12h

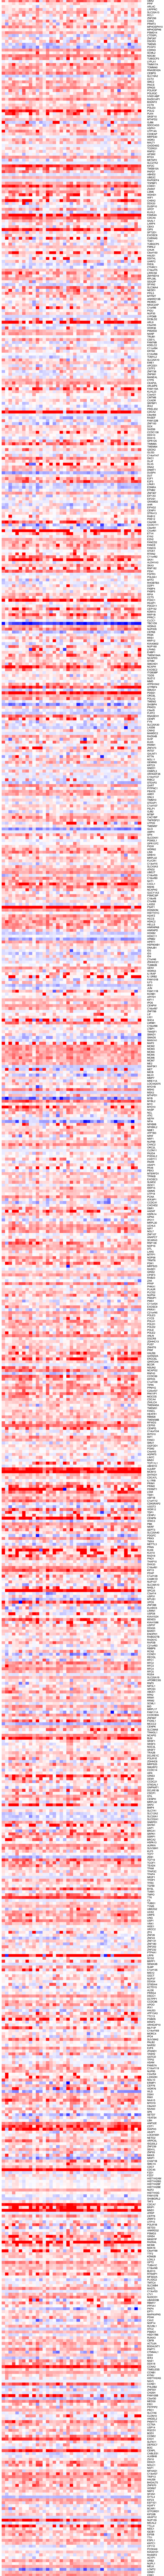

- CTG196
- PI3K
- LOC10288413
- LOC10288414
- PARF2
- PARF3
- PARF4
- PARF5
- PARF6
- PARF7
- PARF8
- PARF9
- PARF10
- PARF11
- PARF12
- PARF13
- PARF14
- PARF15
- PARF16
- PARF17
- PARF18
- PARF19
- PARF20
- PARF21
- PARF22
- PARF23
- PARF24
- PARF25
- PARF26
- PARF27
- PARF28
- PARF29
- PARF30
- PARF31
- PARF32
- PARF33
- PARF34
- PARF35
- PARF36
- PARF37
- PARF38
- PARF39
- PARF40
- PARF41
- PARF42
- PARF43
- PARF44
- PARF45
- PARF46
- PARF47
- PARF48
- PARF49
- PARF50
- PARF51
- PARF52
- PARF53
- PARF54
- PARF55
- PARF56
- PARF57
- PARF58
- PARF59
- PARF60
- PARF61
- PARF62
- PARF63
- PARF64
- PARF65
- PARF66
- PARF67
- PARF68
- PARF69
- PARF70
- PARF71
- PARF72
- PARF73
- PARF74
- PARF75
- PARF76
- PARF77
- PARF78
- PARF79
- PARF80
- PARF81
- PARF82
- PARF83
- PARF84
- PARF85
- PARF86
- PARF87
- PARF88
- PARF89
- PARF90
- PARF91
- PARF92
- PARF93
- PARF94
- PARF95
- PARF96
- PARF97
- PARF98
- PARF99
- PARF100

up-24h

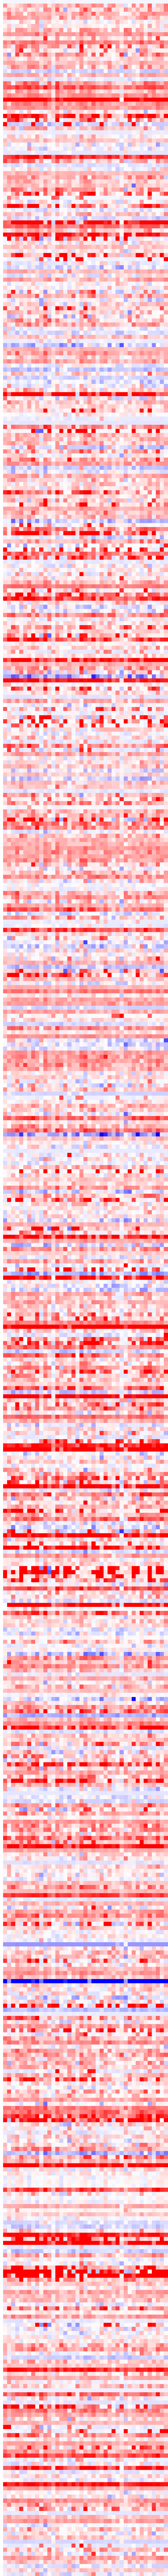

TRRAP  
CHAF1A  
PARP2  
SMC4  
TSPAN5  
PP1F  
KIF20A  
LRRK1  
CLEC3A  
SLC25A13  
CDK2  
DDX39  
PSMD14  
SRBM1  
DLEU1  
CDKN2C  
CDKN3  
SCML2  
HIST4E  
TUBGCP3  
MAD2L2  
EMG1  
TACC3  
PRK4  
ESR1  
RNAHEX2A  
LEPREL2  
ANP32B  
CENPA  
SMN2  
SPAG5  
CENPE  
RAD51AP1  
CENPF  
CTCF  
DCAF1  
PLK4  
GJB6  
RUVBL2  
GADD45G  
TCERG1  
MRE11A  
AP3M2  
SLC27A3  
SLC27A2  
KIF2C  
PARG2  
ARH2  
CEP110  
UBE2C  
TOPBP1  
ZNF101  
ZNF102  
LSM6  
WDHD1  
WIF1  
CHKA  
CHEK2  
DUSP10  
NRM  
KHL2  
FAM54A  
CDC45  
FANCL  
NBS1  
CHRNA5  
TOE1  
FMNL2  
CHUK  
C6orf150  
DDIT4  
DKB  
DIS3L  
C16orf75  
RBP7  
FXR3L  
FTSL3  
SFXN4  
NEDD1  
PPI5L  
INCOBC  
NRXN3  
C10orf96  
NUP35  
DCBLD2  
SCLT1  
CSE1L  
KDEL2  
CDAN1  
EME1  
IGFLL2  
CREBBL4  
CTFPS  
CKAP2L  
KHL23  
SGOL2  
SLC16A14  
CCDC80  
CMT1  
CEP120  
IRX2  
PRELID2  
SNRNP48  
CDC42  
FAM122B  
DCK  
SASS6  
CCDC138  
TMEM64  
C2orf175  
ZNF315T16  
DKC1  
DLX5  
DNA2  
DNMT1  
DNMT3B  
SKI1  
DTYMK  
DUT  
E2F1  
LRR1  
ECT2  
LRR1  
ENF2  
ZNF367  
RPL22L1  
CENPV  
STR13  
C4orf25  
C2orf69  
ETV4  
EZH2  
FANCD2  
FANCG  
UNC5B  
RTKN2  
C11orf82  
SKA1  
HNRNPA3  
SKI3  
ZBTB9  
RNF182  
FEN1  
FGD1  
FGFR3  
CACSB  
PHLDA1  
DZIP1  
FKBP4  
RPIA  
TFEB  
AZI1  
CEP152  
FOXM1  
ALDOC  
TBC1D2B  
MKS2  
NUP205  
PASK  
KIAA0664  
TMEM194A  
NCAPD3  
HAUS5  
NCAPH  
ITGB3BP  
PES1  
HEY2  
SUGT  
PDS1  
ORC5L  
POLA2  
LSM5  
SH3BP4  
KIF13L  
PEL1  
CENPI  
CNIH2  
MAMDC2  
RAD54B  
BAX3B  
KLK5  
PARM1  
ZNF473  
SOSTDC1  
MMACHC  
KIF23  
TBC1D10B  
OSBPL3  
ARHGEF26  
PHF19  
RIBC2  
FBXO5  
EHF  
TIMM10  
DAZAP1  
GREM1  
CKAP2  
GEM  
LAMP3  
MTBP  
GLA  
SFN  
SLC18A1  
RAS2L3  
C14orf80  
FAM100B  
WDR62  
CCDC150  
TMEM15B  
LIN8  
C13orf15  
SLC43A3  
ATAD2  
NDUFA4  
UBI2  
C18orf80  
RACGAP1  
MSH6  
NCAPH2  
GUCY1A3  
PSMC3P  
GPSM2  
TNPO2  
HIST1H1C  
HIST1H2AE  
H2AFZ  
HADH  
HMGB2  
HMHR  
HNRNPA1  
HNRNPA6  
HOXA9  
HOXC11  
BIRC5  
DNAJB1  
C10orf174  
ID2  
IDS  
IDA  
IFT1  
WDR53  
IMPA2  
IRS1  
FAM111B  
C5orf34  
C5orf25  
KIT  
KIF11  
KIF12  
KPNA2  
CENPW  
SHISA2  
LBR  
LIF  
LIG1  
SLC25A35  
LMBN1  
TMA5F1  
MAD2L1  
SMAD1  
SMAD7  
MAN1A1  
MCM2  
MCM3  
MCM4  
MCM6  
MCM7  
MICB  
MMP7  
MRE11A  
RNF102  
LOC442075  
MSX2  
MTX1M  
MT2A  
NUT1  
RNF101  
MTRR  
MYBL2  
MYC  
NASP  
NUP2  
NUPA  
NUP88  
OAS3  
ODF2  
CLDN11  
OCL1  
PAG2  
SERPINE1  
GEMIN4  
PAX6  
TPRKB  
GANN  
LUTP18  
PCNA  
CCDC41  
MRTO4  
AADAT  
TUBD1  
PLEKH01  
GPN3  
CKLF  
IPO11  
NUSAP1  
PCNA  
SCARA3  
GTSE1  
DTL  
PDPFB  
NUP59  
GINS2  
ENPP2  
COQ3  
PKNOX1  
FKP1  
PLAT  
PLK1  
PMAIP1  
PMS2L1  
PRRX1  
C21orf45  
POLE1  
POLD1  
POLD2  
POLE  
POLE2  
POLH  
ANKK1  
FAM64A  
ANKRD16  
NSMCE4A  
HAUS6  
ERAS3  
NCAPG2  
RNF43  
CCDC99  
MRPL16  
C10orf109  
PRM10  
C12orf48  
MOCC5  
CDC44  
ZWILCH  
C9orf40  
ANK1  
CDC4B  
ARMC1  
DARS2  
RFWD3  
ARHGEF10L  
CEP55  
FANCI  
LRRC1  
C14orf106  
AGPAT5  
MNS1  
TCF12L1  
HJURP  
MCM10  
ZNF331  
KIAA1704  
CDCA17L  
IL17R5  
FOXRED1  
PRIM1  
PRIM2  
G2E3  
DEPDC1  
OSGEP  
LYAR  
NHP2  
IPO9  
TMEM48  
CEP75  
ASF1B  
C10orf112  
CDK5RAP2  
UGGT2  
DEPDC1B  
PCID2  
CENPJ  
CENPN  
WWC3  
FBN3  
SLC25A40  
PRPS1  
KLK7  
KLK6  
KLK10  
RAV1B  
THAP10  
KIF15  
CAMK1D  
NUP107  
SALL4  
KIF25  
KIAA1524  
BEND3  
DDX55  
CCNB1IP1  
BARD1  
PEX15  
CREBZF  
RAD9A  
RAP2B  
MESDC1  
CCND1  
RFC2  
RFC3  
RFC4  
RFC5  
RGS4  
SLC25A19  
RRBP1  
RRM1  
RRM2  
SCNN1G  
FAM111A  
CHTF18  
CCDC90A  
FIGNL1  
MCC2  
CENPF  
NCAPG  
BLM  
DNAJC1  
TRA2B  
DCLRE1C  
POLR1E  
SCS1  
SHB  
ZNF574  
CCDC14  
GINS3  
CCDC21  
STL  
CENPH  
SKP2  
UPF3B  
UPF3A  
BMP4  
MZF2A  
RASL11B  
SNRPD1  
BRCA1  
SSRP1  
HNR13  
ALRKA  
SUV39H1  
TAF5  
KLF5  
TFC19  
TCO1  
BUB1  
BUB1B  
TFAP2C  
NR2F1  
TFRC  
TGFB1  
THOP1  
TIAM1  
TKI  
TMFO  
TOP2A  
TTK  
C5  
TYMS  
UBE2G2  
UCP2  
USP1  
VRK1  
WHSC1  
XPO1  
XRCC1  
XRCC2  
ZNF222  
DNAL1  
CXCR4  
IFRD2  
C7orf49  
C10orf35  
GGCT  
CENPM  
DSCC1  
CCDC86  
MLPH  
C11orf83  
TAF1D  
IRX1  
HAUS3  
RNF219  
PCNA  
C5orf211  
C4orf31  
MLF1IP  
IPO4  
E2F8  
ZNF50  
ZNF665  
SHFM1  
SHOCP1  
ZMYM1  
C13orf34  
C11orf119  
NUP85  
CEP76  
DSN1  
TTC26  
RMI1  
PIF1  
ASRGL1  
SPSB1  
MYO19  
REEP4  
SLC7A5  
LBN  
FAM83D  
ANP32E  
CDT1  
DIAPH3  
AKT2  
LOC151691  
NUAK2  
NETO2  
ZNF239  
LAS1L  
KIF18A  
NRP1  
CHAF1B  
CDC7  
CDC45  
FZ07  
HIST1H2AM  
HIST1H2BG  
HIST1H2BF  
HIST1H2BE  
MXD3  
HIST1H2BI  
HIST1H3D  
NUF2  
HIST1H3G  
HIST1H4C  
HIST1H4E  
SH3BPGL2  
CRISPLD2  
ATAD3B  
BRP1  
RNF103  
ATRIP  
BCAR3  
CEP78  
ZNRF3  
ANKRD32  
CMT2  
CCDC77  
MCM8  
TTF2  
LOXL3  
PSRC1  
TUBA1C  
C19orf48  
HIRIP3  
RTN4P1  
NFS2A  
MAK1  
C13orf33  
UBASH3B  
ARGGAP19  
RHPN2  
RNF101  
ITPR1  
PDXK  
RRP1  
RNP14  
STC2  
ZNF333  
GCH  
CCNA2  
TIMELESS  
CCNB1  
HIST1H2AG  
USP9B  
NAV3  
CCNE1  
ZNF551  
KIF25H  
FAM105B  
MEX3B  
C15orf23  
PSTPIP2  
PRC1  
PPP1R3E  
CLON10  
PKMT1  
SMC3  
CCNB2  
RRP9  
RCCD1  
EXO3  
DEPDC7  
BOC  
CENPL  
ALKB8  
ZWI10  
BUB3B  
ALRKB  
PTTG1  
NAF1  
C20orf72  
HIST1H3  
HIST1H3A  
ZNF670  
ANUB1  
WDR67  
KIF23  
MFDU1  
CHUS1  
GTF2IRD1  
KIF20B  
AKAP12  
SNCAIP  
KIF1  
CEP135  
ESPL1  
KNTC1  
CP110  
KIAA0101  
FAM105B  
DLGAP5  
SFI1  
URB2  
NUPBL1  
MELK  
CENSI  
CDC6  
FAM20B  
NCAPD2  
CDC20  
KIF1  
MAFB  
CDC25A  
CDC25B

down-6h

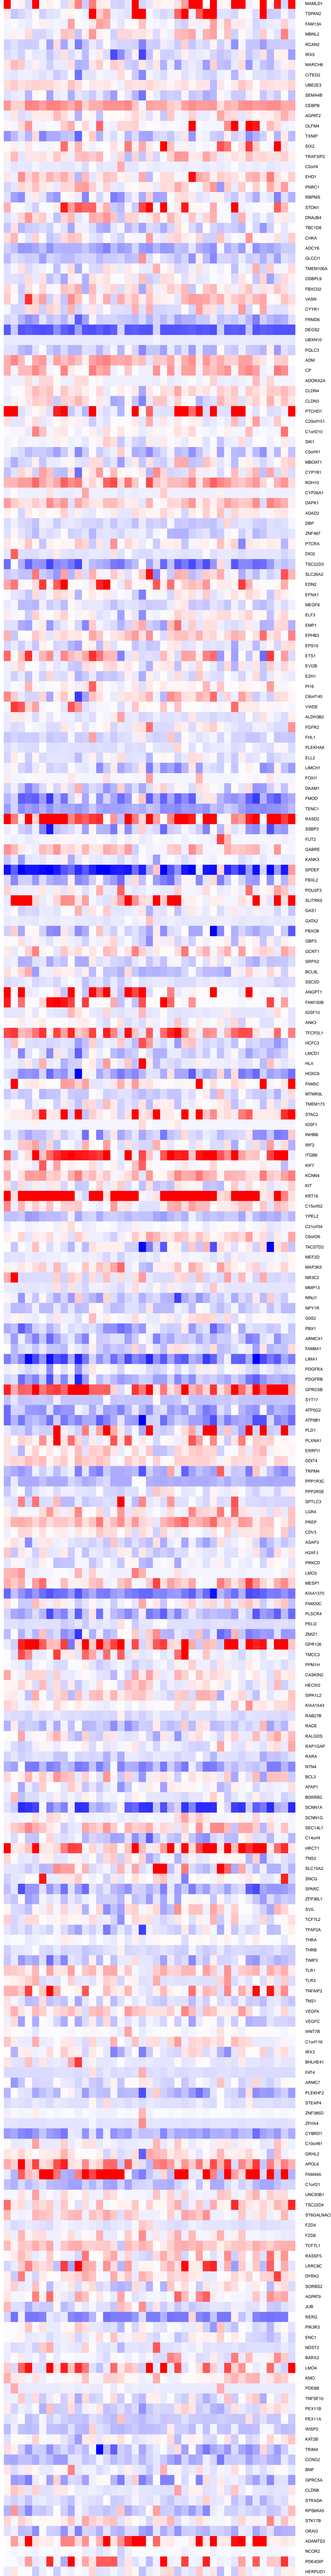

- MAML1
- TSPAN2
- FAM13A
- MBNL2
- RCAN2
- IRX5
- MARCH6
- CITED2
- UBE2E3
- SEMA4B
- CEBPB
- AGPAT2
- OLFM4
- TXNIP
- SIX2
- TRAF3IP2
- C5orf4
- EHD1
- PNRC1
- RBPMS
- STON1
- DNAJB4
- TBC1D8
- CHKA
- ADCY6
- GLCC1
- TMEM106A
- OSBP9
- FBXO32
- VASN
- CYYR1
- FRMD6
- DEGS2
- UBXN10
- PQLC3
- ADM
- CP
- ADORA2A
- CLDN4
- CLDN3
- PTCHD1
- C20orf151
- C1orf210
- SIK1
- C5orf41
- MBOAT1
- CYP1B1
- RDH10
- CYP26A1
- DAPK1
- ADAD2
- DBP
- ZNF467
- PTCRA
- DIO2
- TSC22D3
- SLC26A2
- EDN2
- EFNA1
- MEGF6
- ELF3
- EMP1
- EPHB3
- EPS15
- ETS1
- EVI2B
- EZH1
- P16
- C6orf145
- VWDE
- ALDH3B2
- FGFR2
- FHL1
- PLEKHA6
- ELL2
- LIMCH1
- FOXI1
- DAAM1
- FMOD
- TENC1
- RASD2
- SSBP2
- FUT2
- GABRE
- KANK3
- SPDEF
- FBXL2
- POU2F3
- SLITRK5
- GAS1
- GATA2
- FBXO8
- GBP3
- GCNT1
- SRPX2
- BCL9L
- SSC5D
- ANGPT1
- FAM150B
- IGSF10
- ANK3
- TFCP2L1
- HCFC2
- LMCD1
- HLX
- HOXC6
- FAM5C
- MTMR9L
- TMEM173
- STAC2
- IGSF1
- INHBB
- IRF2
- ITGB8
- KIF7
- KCNM4
- KIT
- KRT16
- C15orf52
- YPEL2
- C21orf34
- C6orf26
- TACSTD2
- MEF2D
- MAP3K5
- NR3C2
- MMP13
- NINJ1
- NPY1R
- G0S2
- PBX1
- ARMCX1
- FAM8A1
- LIMA1
- PDGFRA
- PDGFRB
- GPRCSB
- SYT17
- ATP5G2
- ATP8B1
- PLD1
- PLXNA1
- ERRF1
- DDIT4
- TRPM4
- PPP1R3C
- PPP2R5E
- SPTLC3
- LGR4
- PREP
- CDV3
- ASAP3
- H2AFJ
- PRKCD
- LMO3
- MESP1
- KIAA1370
- FAM20C
- PLSCR4
- PELI2
- ZMIZ1
- GPR126
- TMCC3
- PPM1H
- CASKIN2
- HECW2
- SIPA1L2
- KIAA1543
- RAB27B
- RAGE
- RALGDS
- RAP1GAP
- RARA
- NTN4
- BCL3
- AFAP1
- BDKRB2
- SCNN1A
- SCNN1G
- SEC14L1
- C14orf4
- HRCT1
- TNS3
- SLC15A2
- SNCG
- SPARC
- ZFP36L1
- SVIL
- TCF7L2
- TFAP2A
- THRA
- THRB
- TIMP3
- TLR1
- TLR3
- TNFAIP2
- TNS1
- VEGFA
- VEGFC
- WNT7B
- C10orf116
- IRX3
- BHLHE41
- FAT4
- ARMC7
- PLEKHF2
- STEAP4
- ZNF385D
- ZFX4
- CYBRD1
- C10orf81
- GRHL2
- APOL6
- FAM49A
- C1orf21
- UNC93B1
- TSC22D4
- STGALNAC5
- FZD4
- FZD8
- TCF7L1
- RASSF5
- LRR8C8
- DYRK2
- SORBS2
- AGPAT9
- JUB
- RERG
- PIK3R3
- ENC1
- NDST2
- BARX2
- LMO4
- KMO
- PDE8B
- TNFSF10
- PEX11B
- PEX11A
- WISP2
- KAT2B
- TRIM4
- CCNG2
- BMF
- GPRCSA
- CLDN8
- STRADA
- RPS6KA5
- STK17B
- ORA3
- ADAMT3
- NCOR2
- PDE4DIP
- HERPUD1
- SEMA3E
- SNPH
- SERTAD2



down-24h

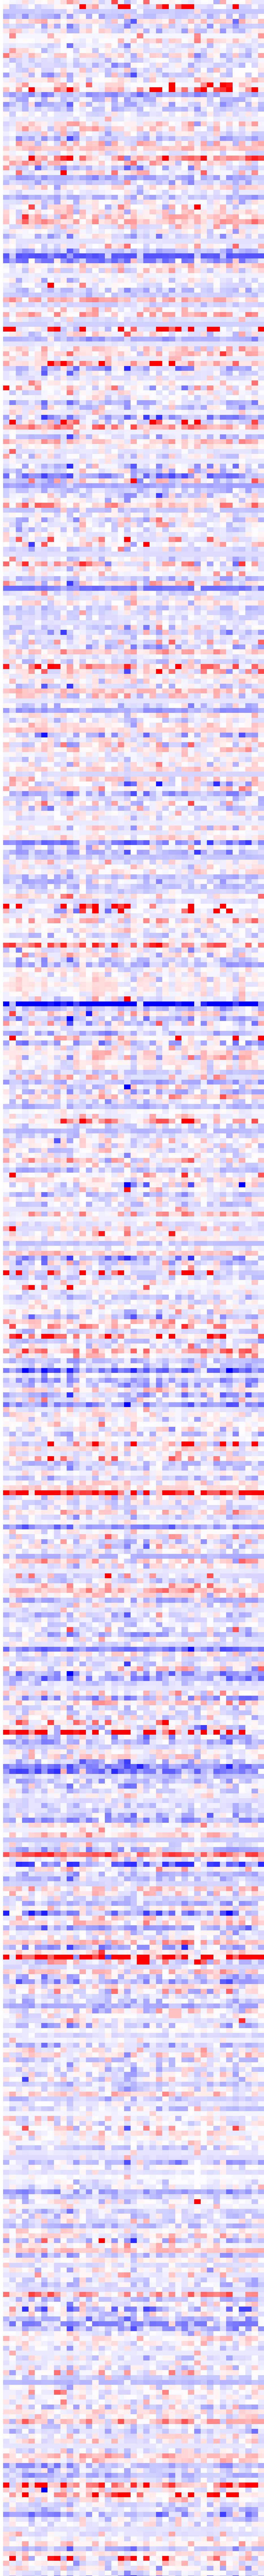

- HDAC5
- BCL2L1
- TSPAN2
- TSANP1
- CTDSP2
- OPFN1
- RCAN2
- MARCH6
- CRISP3
- NPM2
- CHED2
- FGFR2C
- COG5
- CAP2
- UNC13B
- FBLN5
- SSRP2
- AGPAT2
- OLFM4
- SLC34A2
- MXD4
- S15GALNAC2
- TNMP1
- MGEA5
- TOB2
- C5orf4
- FRG3
- DNAH5
- ADAMT55
- PRSS23
- BTN3A1
- CH3L1
- OPN1
- PADI2
- ZHX1
- CHP
- SYNRG
- ADCY6
- GLC3C
- TWF2
- SYNPO
- EFHC1
- OSBP19
- OSBP10
- FBXO32
- VASN
- LRR42
- CYR1
- FAM129A
- TPP1
- TMEM45B
- LRIG3
- FRMD6
- DEGS2
- ZC3H6
- SLC43A2
- SLC44A3
- C1orf88
- COL11A1
- ACUR1C
- POLC3
- CPEB2
- ADM
- CMBL
- STXBP5
- CP
- ADHFE1
- MUM1L1
- PTCHD1
- DOCK11
- CRF1
- MPF7
- CSF2RB
- IL34
- CST6
- KLC2
- TMC4
- CTGF
- BNIP1
- C1orf210
- RNF187
- CTNNA1
- SIK1
- CTNND1
- PROM2
- GPR155
- CTSD
- SLC2A12
- RDH10
- CYP26A1
- DAB2
- CDH9
- ADRD2
- DIC2
- DNASE1L1
- DPP4
- DPVD
- DPFSL2
- TSC22D3
- SLC26A2
- ABAT
- EGR1
- SERPINF1
- ELC3
- CC2D1B
- ELN
- SLC39A11
- EMR1
- SLC23A1
- EPAS1
- EPB41L1
- EPHA4
- SLC36A1
- ERBB4
- ERBB4
- ETFDH
- ETS1
- ETS2
- PIK2B
- FBN1
- C6orf145
- PRR15
- FECH
- GPC4
- ALDH5A1
- FGFR1
- FHL1
- ITGA11
- PLEKHA6
- ELSTM1
- ZBTB1
- ELL2
- SHANK2
- LIMCH1
- ZNF292
- WDR101
- TNK1
- CAND2
- KDM4C
- PEG10
- GRAMD4
- SILF1
- SEL1L3
- LPHN2
- FM05
- WFS1
- TM6SF2
- NCSTN
- ATP13A2
- OPN3
- ACOT9
- SSRP1
- PLD3
- GABARAPL1
- FJX1
- FRK
- RNF14B
- RASGEF3
- BACE2
- RAB26
- GALK2
- HEATR5A
- RND3
- LRP10
- GLCE
- RAI14
- HERC4
- CCDC69
- GAS1
- AK5
- GBP2
- SEZ6L2
- SLC17A5
- MYO2
- LATS2
- HBP1
- NBEA
- LYPD3
- NAA4
- GLB1
- RBMS3
- GNS
- GPC1
- KCTD21
- CD163L1
- C17orf28
- ANGPT1
- ODH9
- IGSF10
- OPN1L1
- ANK3
- TRIB2
- C11orf54
- ANPEP
- TFRC1L1
- NME7
- GYPC
- LMCD1
- EHD2
- HIVEP2
- ANKK5
- HLA-DMA
- HLA-DQA1
- HLA-DQB1
- MR1
- HLX
- FOXA1
- HNRNP2
- PRMT2
- HSD17B4
- NDS1
- ICAM1
- FAM5C
- IGFBP2
- AFAP2
- RBPJ
- IL7R
- IL10RA
- ITGA3
- ITGB6
- ITPR1
- JUP
- KAL1
- CD82
- AGRN
- YPL2
- C21orf34
- VGLL3
- KRT86
- ARHGEF37
- LAMA2
- LAMA4
- LAMP1
- ABLIM1
- LIPA
- IL2
- FADS3
- LOX
- LRP1
- LSS
- LY75
- TACSTD2
- MAF
- ARSD
- MBL5
- MES2
- MEDK3
- MFGES8
- KITLG
- MLL3
- NR3C2
- MME
- MMRN1
- MN1
- CTRB2
- ASS1
- MUC1
- MYLK
- NEDD9
- NPR3
- NPY1R
- NT5E
- NTRK2
- OLB1
- SLC22A18
- DCAF8
- PI15
- TXNDC11
- SID2
- ZDHHC9
- ANGPTL4
- CERCAM
- CPA4
- CRML1
- C19L
- CDK18
- PLAC8
- HEMK1
- PCYOX1
- LIMA1
- PDGFRA
- PDGFRL
- YPEL5
- BRP44L
- TMEM66
- ERAP1
- ATPB1
- CDK14
- ATPV1A
- PHB
- ATPV1B1
- SERPINE2
- PIK3C2B
- PLAU
- PLD1
- PLD2
- ATPV0A1
- PLXNA1
- ATP7A
- RIN2
- POAB
- HEATR5B
- CPVL
- DDIT4
- PPARA
- MANSC1
- PD1
- GRAMD1C
- KLHL24
- PPIC
- BCAS3
- C10orf25
- MFSDF
- PALMD
- TBC1D8B
- PPL
- WIF1
- PPP1R3C
- TAFBP1
- ANO10
- ETNK2
- SPTLC3
- SLC29A3
- LGR4
- PREP
- SRGN
- GALNT10
- DOCK10
- HGS
- LMBRD1
- FAM33A
- PRKCD
- ACSS2
- SUF2
- ANKH
- PRLR
- KIAA1370
- SERTAD4
- CPH4
- PRSS8
- TRIM39
- OLFML3
- PLSCR4
- PNPLA2
- TMEM30
- KIAA1147
- KIAA1244
- PTAFR
- PBXIP
- SLC24A3
- NDRG3
- TMCC3
- ZNF512B
- RNF150
- SLC22D2
- SERINC1
- SRGAP1
- ARRDC3
- SIPA1L2
- KIAA1522
- CALCCOC1
- WDR19
- PTPN13
- BBS2
- SQRDL
- TP53NP2
- RHOJ
- RAB27B
- ENPP5
- RARA
- RARRS3
- NTRK1
- SCPEP1
- RBP4
- RIT1
- KCNK15
- C6orf25
- RPS8KA2
- S100A8
- SATB1
- SCNN1A
- BICD1
- ABHD4
- CXCL12
- FAM38B
- SECTM1
- PRDM1
- RBK5
- MOAP1
- TMBIM1
- SEPP1
- ERAP2
- SERPINE1
- RAB17
- TNS3
- FAM59A
- FNDC3B
- DEPDC6
- OSPC2A
- SLC15A2
- BMPR1B
- SLF1
- BNIP3
- SPARC
- SPP1
- STAT3
- STAT6
- ZFP36L1
- SUX1
- SVIL
- BTG1
- TFPI
- THBS1
- THRA
- THRB
- THRS
- THRS
- THRS
- TIMP3
- TLR3
- TLR6
- TM7SF2
- SERPING1
- TNFAIP6
- C3
- TUFT1
- LUC3
- VDR
- VEGFA
- C18orf1
- ZNF18
- TMEM50B
- CA11
- ZNF185
- CACNB3
- YIPF2
- C10orf16
- CNTF4B
- GLB1L
- LASS4
- ACSS3
- FAT4
- PLEKHF2
- VTCN1
- STEAP4
- ZNF385D
- DHR512
- PIRHC
- CYBRD1
- KIAA319L
- POF1B
- FRAS1
- CPEB4
- SSN1
- FAM117A
- C1orf21
- CAMK2D
- CAPN1
- CAST
- FZD8
- TCF7L1
- GLT8D2
- CASP1
- CD9L2
- CACNA1C
- TMTC1
- KCTD10
- SRPX
- SLITRK6
- BBX1
- GLIS2
- CARD6
- LNX1
- SORBS2
- TMEM87B
- RERG
- AGXT2L2
- PIK3R3
- KMO
- PLA2G4C
- PPP2B
- PDE8B
- NCOA1
- ABCC3
- TNFSF10
- PEX1
- PEX11A
- INPP4B
- KAT2B
- SYNJ2
- RSPRY1
- BARF
- C12orf23
- SLC7A7
- PAPSS2
- PAPSS1
- SLC16A4
- SLC39A13
- SYT12
- OSMR
- REMR
- FAM144A1
- GPR56
- CD14
- SLIT2
- ARHGAP12
- TP53NP1
- ARHGFB6
- IL27RA
- MAGED1
- ADAMT33
- ADAMT31
- ENTP1
- PREPL
- CD83
- TRAM2
- HERPUD1
- NG51AP
- SEMA5E
- TMEM63A
- CLSTN3
- KIAA0247
- FAM38A
- ANKS1
- CLU7
- SEC24D
- FIG4
- MVP
- TNFSF15
